# Supplementary material
Source: publisher site journal article supplement (https://www.dovepress.com/article/426897)
Supplement: Supplementary file 1 [file get_supplementary_file.php]

**Table S1 Characteristics of patients with COPD distributed on driving time**

| Driving time (minutes) | <10  n=13 | 10-19.99  n=6 | 20  n=60 | *p* |
| --- | --- | --- | --- | --- |
| Age (yrs), mean (SD) | 69 (5) | 67 (7) | 62 (7) | <0.01 |
| Sex (male), n (%) | 3 (23) | 3 (50) | 35 (58) | 0.07 |
| Cohabitation, n (%) |  |  |  |  |
| Living alone | 4 (31) | 4 (67) | 19 (32) | 0.22 |
| Living with partner | 9 (69) | 2 (33) | 41 (68) |  |
| Years of education, mean (SD) | 12 (3) | 12 (3) | 13 (3) | 0.71 |
| Employment status, n (%) |  |  |  |  |
| Not working | 1 (8) | 1 (17) | 19 (32) | 0.21 |
| Working | 3 (23) | 1 (17) | 18 (30) |  |
| Pensioner | 9 (69) | 4 (66) | 23 (38) |  |
| Smoking, n (%) |  |  |  |  |
| Smoker | 2 (15) | 3 (50) | 24 (40) | 0.19 |
| Former | 11 (85) | 3 (50) | 36 (60) |  |
| Never | 0 (0) | 0 (0) | 0 (0) |  |
| FEV1, % predicted, mean (SD) | 38 (7) | 38 (9) | 34 (8) | 0.28 |
| mMRC (0-4), median (IQR) | 4 (3-4) | 3 (2-5) | 3 (3-4) | 0.75 |
| CAT score (0-40), mean (SD) | 16 (7) | 16 (10) | 18 (6) | 0.50 |
| Obstructive Sleep Apnea and/or ND, n (%) | 10 (77) | 3 (50) | 43 (72) | 0.47 |
| ESS (0-24), mean (SD) | 4 (2) | 4 (3) | 5 (3) | 0.20 |
| Charlson Comorbidity Index Score, median (IQR) | 1 (1-2) | 1 (1-1) | 1 (1-2) | 0.46 |
| Mental health disorder, n (%) | 1 (8) | 2 (33) | 7 (12) | 0.26 |
| HADS (0-42), mean (SD) | 6 (5) | 9 (8) | 9 (6) | 0.35 |
| HADS-Anxiety (0-21), mean (SD) | 4 (3) | 6 (5) | 5 (4) | 0.56 |
| HADS-Depression (0-21), mean (SD) | 2 (2) | 3 (3) | 3 (3) | 0.19 |
| PSS (0-40), mean (SD) | 11 (6) | 12 (10) | 13 (8) | 0.68 |

One patient did not do the driving test. Continuous variables are specified as mean (SD) and categorical variables as number (%). mMRC and Charlson Comorbidity Index Score are not normally distributed and therefore we use median (IQR). Using oneway ANOVA on normally distributed continuously data and Chi-squared for categorical data, to test if there is difference between the three groups. Using Kruskal-Wallis test for data that are not normal distributed, to examine if there is difference between the three groups. Abbreviations: FEV1, Forced Expiratory Volume in one second, % of predicted; mMRC, modified Medical Research Council dyspnea scale; CAT score, COPD Assessment Test score; ND, Nocturnal Desaturation; ESS, Epworth Sleepiness Scale; HADS, Hospital Anxiety and Depression Scale; PSS, Perceived Stress Scale.

**Table S2 Characteristics of patients who did not want to participate in the study**

|  | Patients with COPD not participating (n=87) |
| --- | --- |
| Sex (male), n (%) | 38 (44) |
| Age (yrs), mean (SD) | 66 (7) |
| FEV1, % predicted, mean (SD) | 35 (9) |

Continuous variables are specified as mean (SD) and categorical variables as number (%). Abbreviations: FEV1, Forced Expiratory Volume in one second, % of predicted.
